# Supplementary material for: A new building block for electroactive organic materials? Synthesis, cyclic voltammetry, single crystal X-ray structure, and DFT treatment of a unique boron-based viologen
Source: Royal Society of Chemistry journal article supplement (doi:10.1039/c1cc12265g), 2011-01-01
Supplement: c1cc12265g.pdf [file c1cc12265g.pdf]

## Supplemental Information

### Computational Methods and Results

The viologens and their reduced radical cation counterparts were optimized using the B3LYP exchange-correlation functional[1] and the 6-31G(d,p) basis set as implemented in the Gaussian03 suite of programs.[2] The radical cation species were computed using the unrestricted spin model. Stable structures were confirmed by computing analytic vibrational frequencies. Following the protocol of Baik and Friesner[3] for estimation of reduction potentials, we executed single-point B3LYP/cc-pVTZ calculations and used the CPCM model to obtain solvation corrections. Our best estimates for boroviologen and methyl viologen are 4.05 and 4.30 V, respectively. Details of these calculations are summarized in Tables S1; cartesian coordinates of the optimized structures are provided in Table S2.

[1] (a) Becke, A.D. *J. Chem. Phys.* 1993, **98**, 5648; (b) Lee, C.; Yang, W.; Parr, R.G. *Phys. Rev. B* 1988, **37**, 785; (c) Vosko, S.H.; Wilk, L.; Nusair, M. *Can. J. Phys.* 1980, **58**, 1200; (d) Stephens, P.J.; Devlin, F.J.; Chabalowski, C.F.; Frisch, M.J. *J. Phys. Chem.* 1994, **98**, 11623.

[2] *Gaussian 03, Revision E.01*, M. J. Frisch, G. W. Trucks, H. B. Schlegel, G. E. Scuseria, M. A. Robb, J. R. Cheeseman, J. A. Montgomery, Jr., T. Vreven, K. N. Kudin, J. C. Burant, J. M. Millam, S. S. Iyengar, J. Tomasi, V. Barone, B. Mennucci, M. Cossi, G. Scalmani, N. Rega, G. A. Petersson, H. Nakatsuji, M. Hada, M. Ehara, K. Toyota, R. Fukuda, J. Hasegawa, M. Ishida, T. Nakajima, Y. Honda, O. Kitao, H. Nakai, M. Klene, X. Li, J. E. Knox, H. P. Hratchian, J. B. Cross, V. Bakken, C. Adamo, J. Jaramillo, R. Gomperts, R. E. Stratmann, O. Yazyev, A. J. Austin, R. Cammi, C. Pomelli, J. W. Ochterski, P. Y. Ayala, K. Morokuma, G. A. Voth, P. Salvador, J. J. Dannenberg, V. G. Zakrzewski, S. Dapprich, A. D. Daniels, M. C. Strain, O. Farkas, D. K. Malick, A. D. Rabuck, K. Raghavachari, J. B. Foresman, J. V. Ortiz, Q. Cui, A. G. Baboul, S. Clifford, J. Cioslowski, B. B. Stefanov, G. Liu, A. Liashenko, P. Piskorz, I. Komaromi, R. L. Martin, D. J. Fox, T. Keith, M. A. Al-Laham, C. Y. Peng, A. Nanayakkara, M. Challacombe, P. M. W. Gill, B. Johnson, W. Chen, M. W. Wong, C. Gonzalez, and J. A. Pople, Gaussian, Inc., Wallingford CT, 2004.

[3] M.-H. Baik, R.A. Friesner, *J. Phys. Chem. A*, 2002, **106**, 7407.



Table S1. Computational Estimates of the Reduction Potentials of Boroviologen and Methyl Viologen.

|                                                         | B <sup>2+</sup> | + e-     | -----> | B <sup>+</sup> | kcal/mol | kcal/mol   | E <sup>0</sup> (red) Volts |
|---------------------------------------------------------|-----------------|----------|--------|----------------|----------|------------|----------------------------|
| H: B3LYP/6-31G(d,p)                                     | -895.632349     | 0.002359 |        | -895.917111    |          | -180.1713  | 7.812994                   |
| E:                                                      | -896.1178884    |          |        | -896.4005271   | -177.359 |            |                            |
| E: B3LYP/cc-pVTZ (sp)                                   | -896.3787301    |          |        | -896.6688544   | -182.056 | -184.86862 | 8.01669                    |
| Solvation corrections:<br>ΔG <sub>solv</sub> (kcal/mol) | -119.33         |          |        | -27.84         | 91.49    | -93.378623 | 4.049294                   |
|                                                         | C <sup>2+</sup> | + e-     | -----> | C <sup>+</sup> |          |            | E <sup>0</sup> (red) Volts |
| H: B3LYP/6-31G(d,p)                                     | -574.429468     | 0.002359 |        | -574.756066    |          | -206.42381 | 8.951414                   |
| E:                                                      | -574.6835464    |          |        | -575.0084789   | -203.898 |            |                            |
| E: B3LYP/cc-pVTZ (sp)                                   | -574.8511861    |          |        | -575.1828762   | -208.139 | -210.66424 | 9.135297                   |
| Solvation corrections:<br>ΔG <sub>solv</sub> (kcal/mol) | -150.97         |          |        | -39.49         | 111.48   | -99.184236 | 4.30105                    |

B<sup>2+</sup> and C<sup>2+</sup> denote the parent boroviologen and methyl viologen species, respectively. Structures were optimized using the B3LYP/6-31G(d,p) model. Single-point energy corrections were obtained using the cc-pVTZ basis set. Energies are in Hartrees unless otherwise labeled.



Table S2. Cartesian Coordinates of Optimized Structures (Å).

| Boroviologen                 |          |          |          | Boroviologen Reduced Species |          |          |          |
|------------------------------|----------|----------|----------|------------------------------|----------|----------|----------|
| Charge = 2 Multiplicity = 1  |          |          |          | Charge = 1 Multiplicity = 2  |          |          |          |
| 7                            | 0.42281  | 3.5225   | -0.20254 | 7                            | 0.59506  | 3.53384  | -0.00148 |
| 6                            | -0.08034 | -0.739   | -0.18368 | 6                            | -0.12447 | -0.70475 | -0.00158 |
| 6                            | 0.08034  | 0.739    | -0.18368 | 6                            | 0.12447  | 0.70475  | -0.00158 |
| 6                            | -0.03719 | 2.87662  | -1.29831 | 6                            | 0.49842  | 2.81813  | -1.16932 |
| 1                            | 1.13065  | 3.35071  | 1.73636  | 1                            | 0.64273  | 3.39003  | 2.07457  |
| 6                            | 0.55554  | 1.42224  | 0.94626  | 6                            | 0.27218  | 1.47008  | 1.19995  |
| 6                            | -0.22187 | 1.50295  | -1.3216  | 6                            | 0.26943  | 1.4706   | -1.2031  |
| 1                            | -0.23119 | 3.49197  | -2.16791 | 1                            | 0.63712  | 3.39108  | -2.07775 |
| 5                            | 0.77761  | 5.09016  | -0.2705  | 5                            | 0.90041  | 5.05495  | -0.00148 |
| 1                            | 0.84049  | 0.89431  | 1.84904  | 1                            | 0.22318  | 1.00023  | 2.1739   |
| 1                            | -0.60766 | 1.04487  | -2.22504 | 1                            | 0.2176   | 1.00129  | -2.17716 |
| 1                            | 0.23119  | -3.49197 | -2.16791 | 1                            | -0.63712 | -3.39108 | -2.07775 |
| 6                            | -0.55554 | -1.42224 | 0.94626  | 6                            | -0.27218 | -1.47008 | 1.19995  |
| 6                            | 0.22187  | -1.50295 | -1.3216  | 6                            | -0.26943 | -1.4706  | -1.2031  |
| 1                            | -0.75625 | 8.1367   | 0.35084  | 1                            | -0.95638 | 8.03646  | 0.00272  |
| 6                            | -0.72185 | -2.79797 | 0.89981  | 6                            | -0.50129 | -2.81758 | 1.16625  |
| 1                            | -0.84049 | -0.89431 | 1.84904  | 1                            | -0.22318 | -1.00023 | 2.1739   |
| 1                            | 0.60766  | -1.04487 | -2.22504 | 1                            | -0.2176  | -1.00129 | -2.17716 |
| 6                            | 0.03719  | -2.87662 | -1.29831 | 6                            | -0.49842 | -2.81813 | -1.16932 |
| 1                            | -1.13065 | -3.35071 | 1.73636  | 1                            | -0.64273 | -3.39003 | 2.07457  |
| 7                            | -0.42281 | -3.5225  | -0.20254 | 7                            | -0.59506 | -3.53384 | -0.00148 |
| 1                            | 0.33077  | 7.62841  | -0.97361 | 1                            | 0.52576  | 7.58065  | -0.88812 |
| 1                            | 0.90136  | 7.57334  | 0.71064  | 1                            | 0.52936  | 7.5804   | 0.8874   |
| 5                            | -0.77761 | -5.09016 | -0.2705  | 5                            | -0.90041 | -5.05495 | -0.00148 |
| 6                            | 0.72185  | 2.79797  | 0.89981  | 6                            | 0.50129  | 2.81758  | 1.16625  |
| 7                            | -0.46711 | 6.02935  | 0.18387  | 7                            | -0.49842 | 5.95379  | 0.00149  |
| 1                            | 1.01781  | 5.34147  | -1.41558 | 1                            | 1.46611  | 5.35991  | -1.01747 |
| 1                            | 1.67072  | 5.2776   | 0.50351  | 1                            | 1.46983  | 5.35921  | 1.01264  |
| 6                            | -0.87821 | 5.79749  | 1.60601  | 6                            | -1.32088 | 5.69356  | 1.21991  |
| 6                            | -1.66394 | 5.87563  | -0.70482 | 6                            | -1.32577 | 5.69381  | -1.2137  |
| 6                            | 0.03719  | 7.44512  | 0.05956  | 6                            | -0.07505 | 7.38939  | 0.00084  |
| 1                            | -2.43835 | 6.58689  | -0.409   | 1                            | -2.2088  | 6.33908  | -1.21317 |
| 1                            | -2.06131 | 4.86349  | -0.61359 | 1                            | -1.64169 | 4.65019  | -1.21981 |
| 1                            | -1.36872 | 6.06888  | -1.73645 | 1                            | -0.7247  | 5.89708  | -2.10044 |
| 1                            | -1.65776 | 6.50927  | 1.88698  | 1                            | -2.20331 | 6.33964  | 1.22355  |
| 1                            | -0.01184 | 5.9337   | 2.25382  | 1                            | -0.71592 | 5.89565  | 2.10428  |
| 1                            | -1.26976 | 4.78459  | 1.71377  | 1                            | -1.63778 | 4.65025  | 1.22663  |
| 7                            | 0.46711  | -6.02935 | 0.18387  | 7                            | 0.49842  | -5.95379 | 0.00149  |
| 1                            | -1.01781 | -5.34147 | -1.41558 | 1                            | -1.46611 | -5.35991 | -1.01747 |
| 1                            | -1.67072 | -5.2776  | 0.50351  | 1                            | -1.46983 | -5.35921 | 1.01264  |
| 6                            | 0.87821  | -5.79749 | 1.60601  | 6                            | 1.32088  | -5.69356 | 1.21991  |
| 6                            | 1.66394  | -5.87563 | -0.70482 | 6                            | 1.32577  | -5.69381 | -1.2137  |
| 6                            | -0.03719 | -7.44512 | 0.05956  | 6                            | 0.07505  | -7.38939 | 0.00084  |
| 1                            | 0.75625  | -8.1367  | 0.35084  | 1                            | 0.95638  | -8.03646 | 0.00272  |
| 1                            | -0.33077 | -7.62841 | -0.97361 | 1                            | -0.52576 | -7.58065 | -0.88812 |
| 1                            | -0.90136 | -7.57334 | 0.71064  | 1                            | -0.52936 | -7.5804  | 0.8874   |
| 1                            | 1.65776  | -6.50927 | 1.88698  | 1                            | 2.20331  | -6.33964 | 1.22355  |
| 1                            | 0.01184  | -5.9337  | 2.25382  | 1                            | 0.71592  | -5.89565 | 2.10428  |
| 1                            | 1.26976  | -4.78459 | 1.71377  | 1                            | 1.63778  | -4.65025 | 1.22663  |
| 1                            | 2.43835  | -6.58689 | -0.409   | 1                            | 2.2088   | -6.33908 | -1.21317 |
| 1                            | 2.06131  | -4.86349 | -0.61359 | 1                            | 1.64169  | -4.65019 | -1.21981 |
| 1                            | 1.36872  | -6.06888 | -1.73645 | 1                            | 0.7247   | -5.89708 | -2.10044 |
| Stoichiometry C16H30B2N4(2+) |          |          |          | Stoichiometry C16H30B2N4(1+) |          |          |          |

Methyl Viologen

Charge = 2 Multiplicity = 1

|   |          |          |          |
|---|----------|----------|----------|
| 7 | 3.52793  | -0.00692 | -0.00758 |
| 6 | -0.74446 | 0.00107  | -0.00357 |
| 6 | 0.74447  | -0.00106 | -0.00357 |
| 6 | 2.85668  | 1.09577  | -0.41517 |
| 1 | 3.44984  | -1.9522  | 0.72302  |
| 6 | 1.46877  | -1.13014 | 0.41053  |
| 6 | 1.4725   | 1.12593  | -0.41898 |
| 1 | 3.45642  | 1.93909  | -0.73727 |
| 6 | 5.01843  | 0.00734  | 0.02335  |
| 1 | 0.97362  | -2.02713 | 0.76471  |
| 1 | 0.97979  | 2.02304  | -0.77626 |
| 1 | -3.45641 | -1.93909 | -0.73725 |
| 6 | -1.46877 | 1.13015  | 0.41053  |
| 6 | -1.4725  | -1.12592 | -0.41898 |
| 6 | -5.01844 | -0.00736 | 0.02332  |
| 6 | -2.85368 | 1.10607  | 0.40228  |
| 1 | -0.97363 | 2.02714  | 0.76472  |
| 1 | -0.97979 | -2.02303 | -0.77626 |
| 6 | -2.85667 | -1.09577 | -0.41515 |
| 1 | -3.44984 | 1.9522   | 0.72304  |
| 7 | -3.52793 | 0.00692  | -0.00755 |
| 1 | -5.34864 | -0.44956 | 0.96589  |
| 1 | -5.38434 | -0.59552 | -0.81764 |
| 1 | -5.38483 | 1.01467  | -0.06011 |
| 6 | 2.85368  | -1.10607 | 0.40226  |
| 1 | 5.38434  | 0.59592  | -0.8173  |
| 1 | 5.38485  | -1.01464 | -0.06061 |
| 1 | 5.34857  | 0.44907  | 0.96617  |

Stoichiometry C12H14N2(2+)

Methyl Viologen Reduced Species

Charge = 1 Multiplicity = 2

|   |          |          |          |
|---|----------|----------|----------|
| 7 | 3.5563   | 0.00199  | 0.04303  |
| 6 | -0.71598 | 0.00019  | -0.00222 |
| 6 | 0.71594  | 0.00077  | 0.01057  |
| 6 | 2.85575  | 1.18041  | 0.03168  |
| 1 | 3.45176  | -2.08186 | 0.03701  |
| 6 | 1.4917   | -1.20309 | 0.01881  |
| 6 | 1.49066  | 1.20536  | 0.0188   |
| 1 | 3.45002  | 2.08578  | 0.03698  |
| 6 | 5.02384  | 0.00368  | -0.01469 |
| 1 | 1.02108  | -2.17732 | 0.01883  |
| 1 | 1.01912  | 2.17915  | 0.0187   |
| 1 | -3.45002 | -2.08481 | -0.02921 |
| 6 | -1.49173 | 1.20408  | -0.01006 |
| 6 | -1.4907  | -1.20437 | -0.01084 |
| 6 | -5.02388 | -0.00167 | 0.0231   |
| 6 | -2.85684 | 1.17794  | -0.02288 |
| 1 | -1.02107 | 2.17829  | -0.00979 |
| 1 | -1.0192  | -2.17817 | -0.01131 |
| 6 | -2.85583 | -1.1794  | -0.02367 |
| 1 | -3.45181 | 2.08284  | -0.02777 |
| 7 | -3.55634 | -0.00103 | -0.03457 |
| 1 | -5.36862 | -0.00199 | 1.06153  |
| 1 | -5.40577 | -0.88796 | -0.48482 |
| 1 | -5.40654 | 0.88446  | -0.48453 |
| 6 | 2.85684  | -1.17694 | 0.0317   |
| 1 | 5.40588  | 0.88233  | 0.50636  |
| 1 | 5.36842  | 0.01933  | -1.05304 |
| 1 | 5.40647  | -0.88992 | 0.47954  |

Stoichiometry C12H14N2(1+,2)
